# Supplementary material
Source: PubMed Central journal article supplement (PMC3072798)
Supplement: NIHMS281951-supplement-01.pdf [file NIHMS281951-supplement-01.pdf]

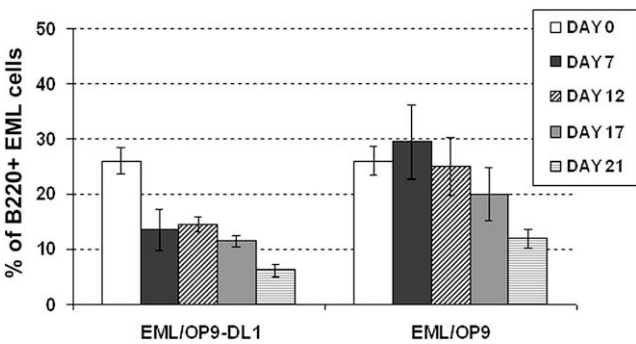

**Supplementary Figure 1.** Flow cytometry analysis of B220 antigen expression on nonadherent EML (naEML) cells from EML/OP9 stromal cells expressing Notch ligand Delta-like 1 (OP9-DL1) and EML/OP9 cocultures. Around 20% to 30% of undifferentiated EML cells express B220 antigen, and naEML cells from OP9-DL1 and OP9 cocultures continued to express B220 marker. However, while the percentage of B220<sup>+</sup> EML cells in EML/OP9 cocultures remained relatively unchanged for 17 days of culture, in EML/OP9-DL1 cocultures the percentage of B220<sup>+</sup> EML cells steadily decreased.

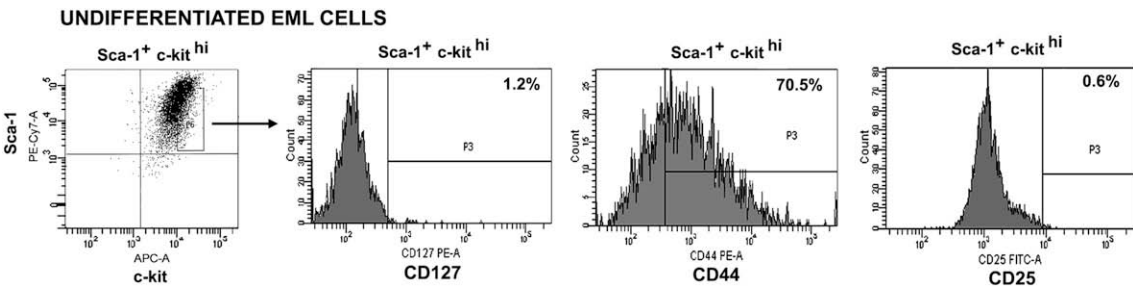

**Supplementary Figure 2.** Flow cytometry analysis of interleukin-7 (IL-7) receptor  $\alpha$  chain (CD127), CD44, and CD25 expression on Sca-1<sup>+</sup> c-kit<sup>hi</sup> undifferentiated EML cells has shown that EML cell line contains a subpopulation of Sca-1<sup>+</sup> c-kit<sup>hi</sup> IL-7R<sup>low</sup> CD44<sup>+</sup> CD25<sup>-</sup> cells that phenotypically resemble early thymic progenitors.
